# Supplementary material for: Deletion of Trpm4 Alters the Function of the Nav1.5 Channel in Murine Cardiac Myocytes
Source: PubMed Central journal article supplement (PMC8037196; doi:10.3390/ijms22073401), 2021-03-26
Supplement: ijms-22-03401-s001.pdf [file ijms-22-03401-s001.pdf]

## Supplementary Figures

A

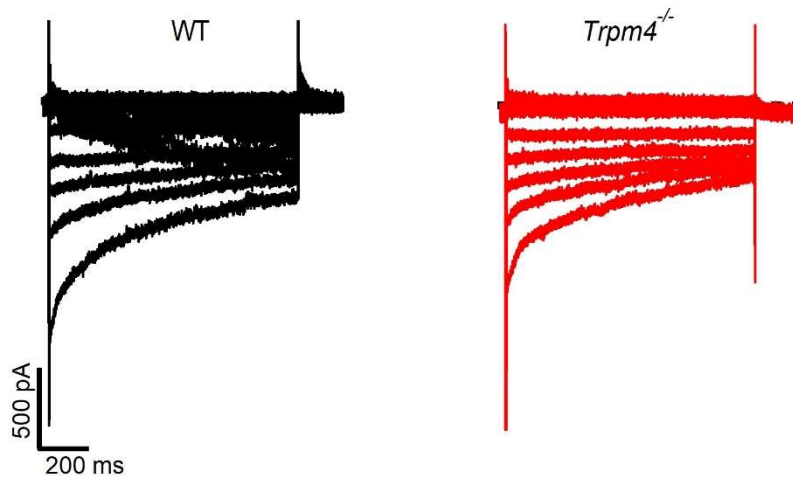

B

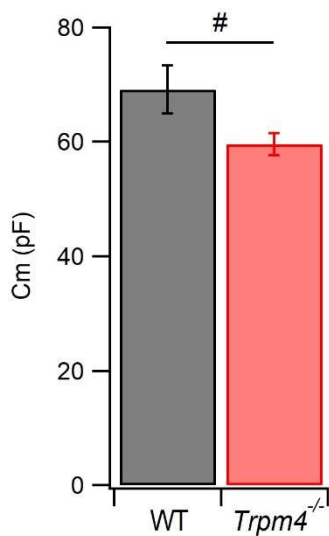

C

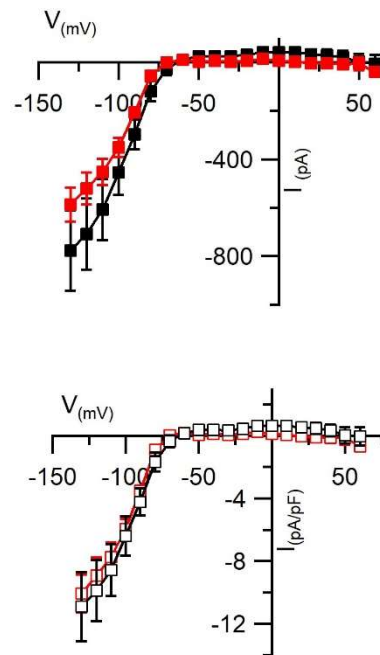

**Supplementary Figure S1:**  $I_{K1}$  current measurement in atrial myocytes. **A)** Representative voltage-clamp current traces for assessment of Ba<sup>+</sup> sensitive inward-rectifier K<sup>+</sup> current  $I_{K1}$  in WT or *Trpm4*<sup>-/-</sup> atrial cardiomyocytes. **B)** Average cell capacitance measured and compared between both genotypes. **C)** Current-voltage relationship of peak  $I_{K1}$  represented either as current or current density normalized to cell capacitance compared between WT ( $N = 3, n = 18$ ) and *Trpm4*<sup>-/-</sup> ( $N = 3, n = 19$ ) mice.

**A**

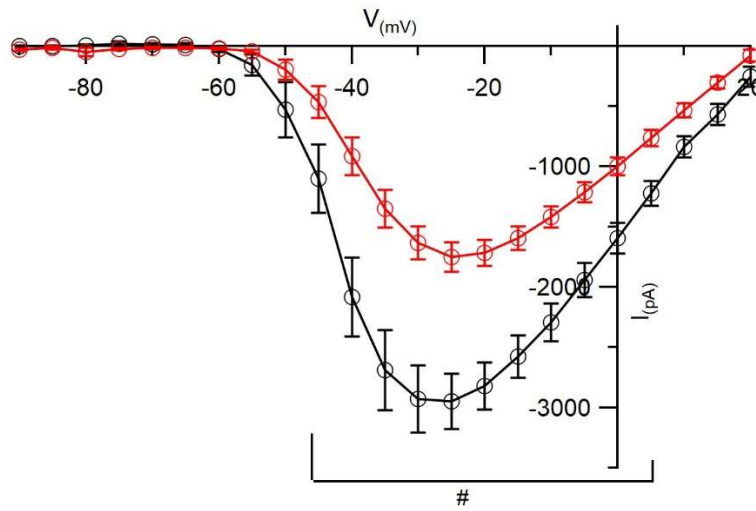

**B**

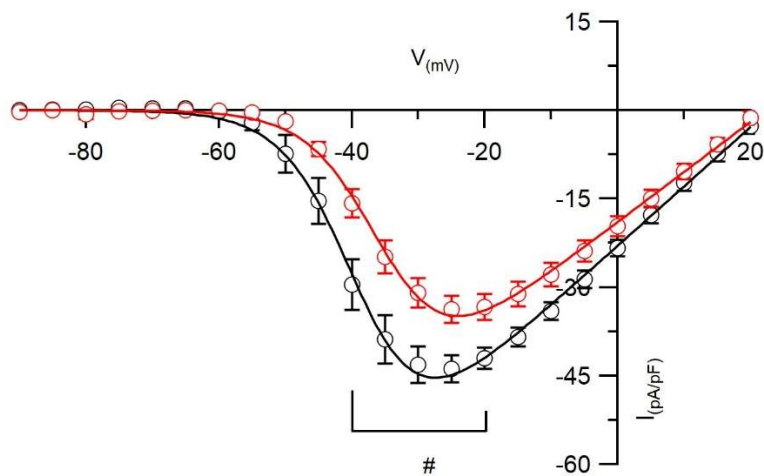

**Supplementary Figure S2:** Nav1.5 current (A) and current density normalized to cell capacitance (B) of WT (black) and  $Trpm4^{-/-}$  (red) mice ( $N = 5$ ;  $n = 20$  for WT,  $n = 22$  for  $Trpm4^{-/-}$ ; #:  $p < 0.05$ , WT vs  $Trpm4^{-/-}$  at a given voltage)

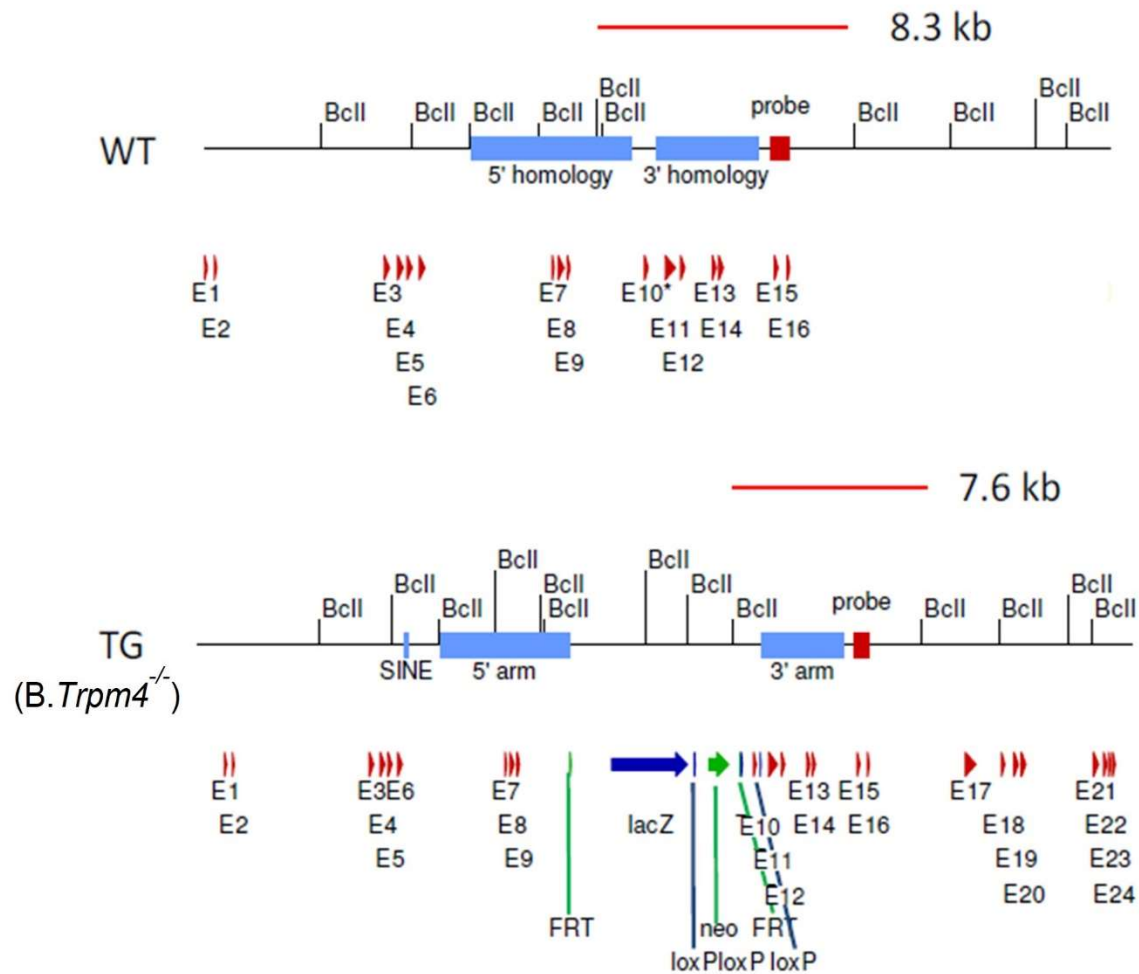

**Supplementary Figure S3:** *Generation of *Trpm4* knock-out mouse strain.* Schematic drawing of the targeted *Trpm4* locus. Two alleles of the *Trpm4* locus are depicted: the wild type locus (WT) and the targeted allele (TG). After homologous recombination, three loxP sites (blue arrows) are inserted into the genome flanking exon 10 of *Trpm4* (red arrows). Additionally, an FRT flanked neomycin (green) / lacZ (blue) cassette is inserted upstream of exon 10. NB: this *B.Trpm4*<sup>-/-</sup> strain (Generated by PolyGene AG, Rümlang, Switzerland) was backcrossed on a C57BL6/J background. In all experiments, male *Trpm4*<sup>-/-</sup> mice and wildtype (WT) littermates aged 12-15 weeks were used.

**A**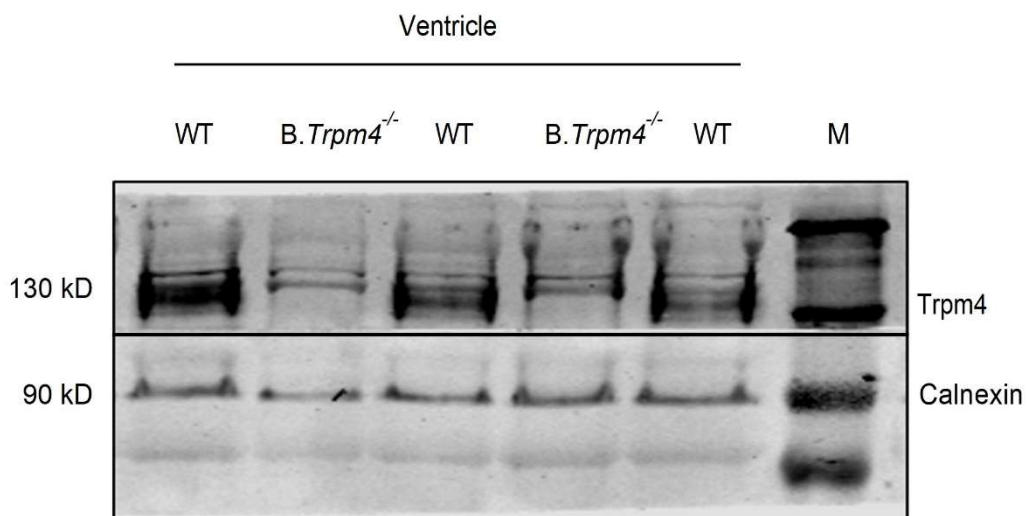**B**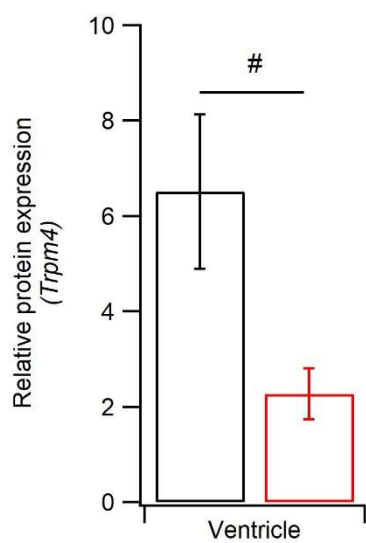**C**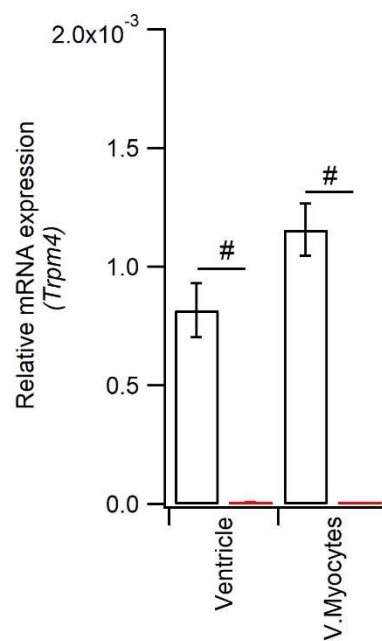

**Supplementary Figure S4:** Expression of *Trpm4* in mouse ventricle. (A) Representative immunoblots of TRPM4 total protein expression in mouse ventricular tissue. Quantification of relative protein (N =7) (B) and mRNA (N =4) (C) in either ventricular tissue or isolated ventricular myocytes. (#:  $p < 0.05$  for WT (black) vs. B. *Trpm4*<sup>-/-</sup> (red))

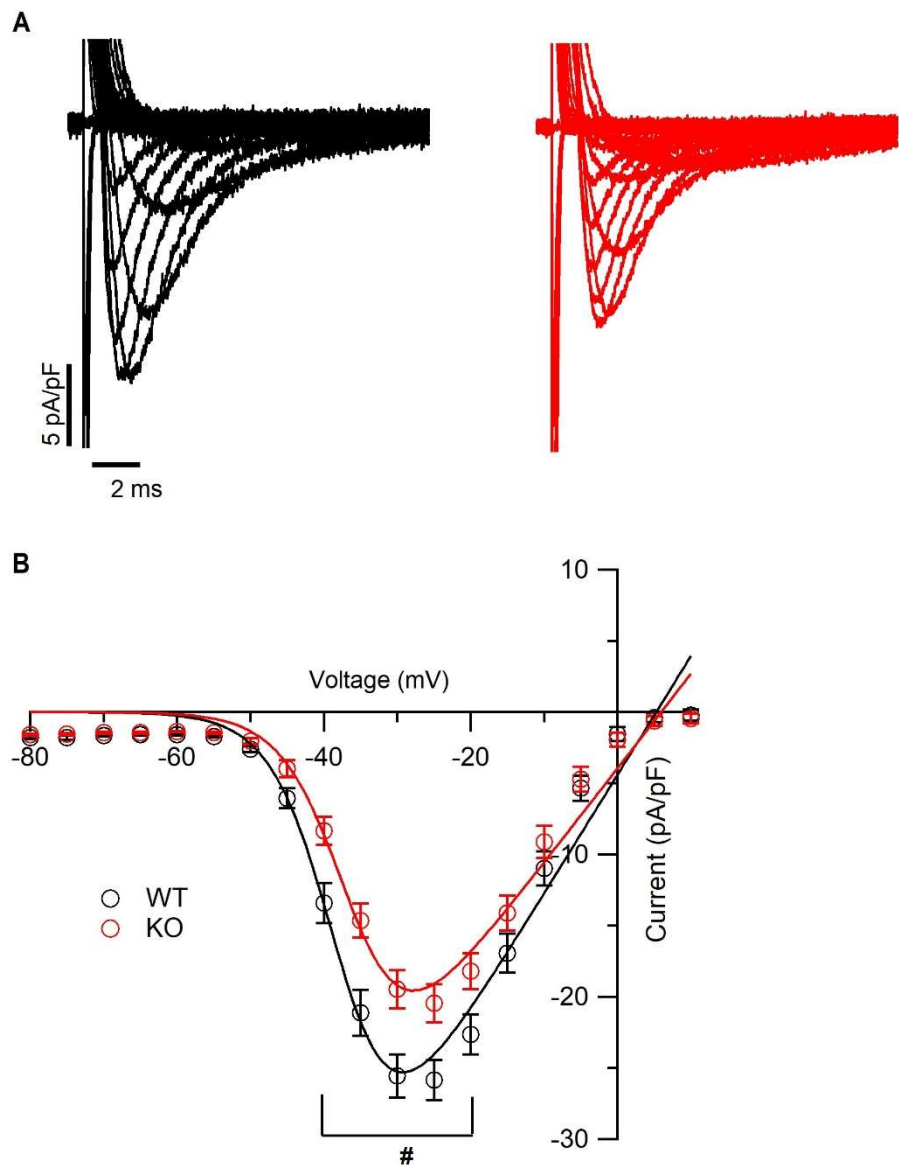

**Supplementary Figure S5:**  $\text{Na}^+$  current recordings from isolated ventricular myocytes. **A)** Representative voltage-clamp current traces for peak  $\text{Na}^+$  current measurements in WT (black) and *B.Trpm4<sup>-/-</sup>* (red) isolated ventricular myocytes. **B)** Current-voltage relationship of peak  $\text{Na}^+$  current represented as current density in WT ( $N = 6, n = 43$ ) and *B.Trpm4<sup>-/-</sup>* ( $N = 6, n = 38$ ) mice. (#:  $p < 0.05$  at given voltages for WT vs. *B.Trpm4<sup>-/-</sup>*)

**A**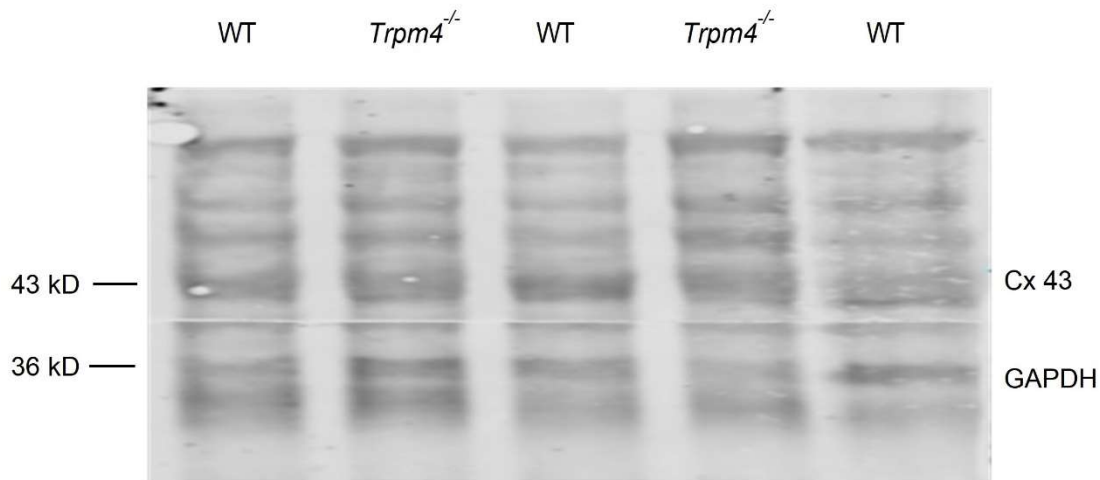**B**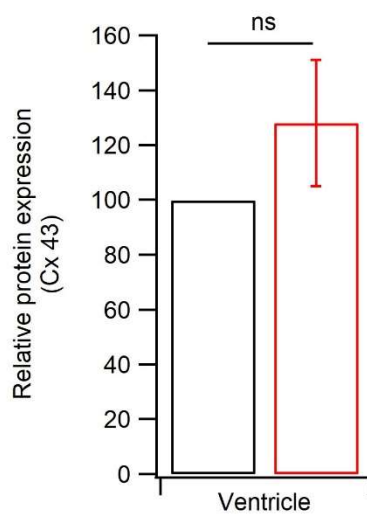**C**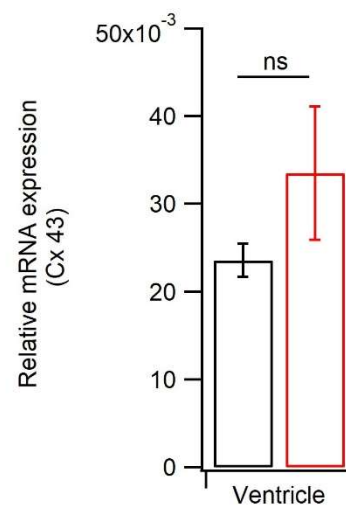

**Supplementary Figure S6: Connexin 43 (Cx 43) expression in WT or *Trpm4*<sup>-/-</sup>.** (A) Representative immunoblots of Cx43 total protein expression in mouse ventricular tissue; WT (black), *Trpm4*<sup>-/-</sup> (red). Quantification of relative protein (B) and mRNA (C) in ventricular tissue. (N = 4; ns – not significant)

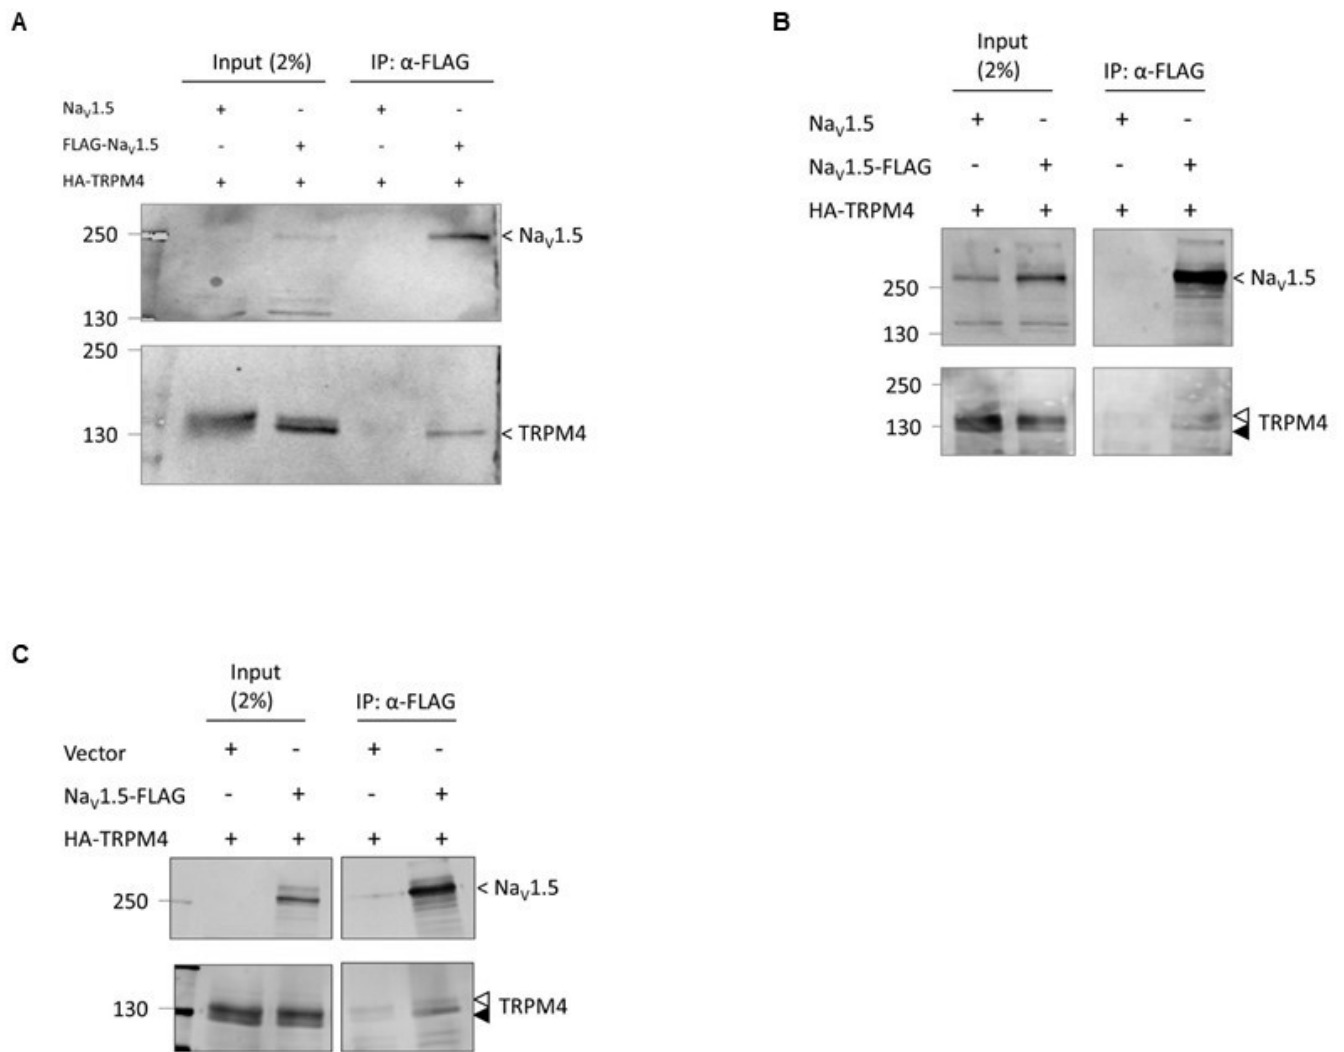

**Supplementary Figure S7: A fraction of TRPM4 binds to Na<sub>v</sub>1.5** : **A, B** and **C** are immunoblots showing biological replicates of co-immunoprecipitation between TRPM4 and Na<sub>v</sub>1.5 in HEK-293 cells. Input signals confirm the expression of Na<sub>v</sub>1.5 with or without FLAG tag and TRPM4. In the immunoprecipitated (IP) fraction, the signal is observed only in the presence of FLAG-Na<sub>v</sub>1.5 and TRPM4.
